# Supplementary material for: Facile preparation of a thermosensitive and antibiofouling physically crosslinked hydrogel/powder for wound healing
Source: Royal Society of Chemistry journal article supplement (doi:10.1039/d2tb00027j), 2022-01-01
Supplement: d2tb00027j1.pdf [file d2tb00027j1.pdf]

## Supporting Information

### Facile preparation of thermosensitive and antibiofouling physically crosslinked hydrogel/powder for wound healing

Xiaoru Dong,<sup>a</sup> Fanglian Yao,<sup>ab</sup> Lijie Jiang,<sup>c</sup> Lei Liang,<sup>a</sup> Hong Sun,<sup>c</sup> Shaoshuai He,<sup>a</sup> Mingyue Shi,<sup>a</sup>  
Zhicheng Guo,<sup>a</sup> Qingyu Yu,<sup>a</sup> Mengmeng Yao,<sup>a</sup> Pengcheng Che,<sup>\*c</sup> Hong Zhang<sup>\*a</sup> and Junjie Li<sup>\*ab</sup>

<sup>a</sup> School of Chemical Engineering and Technology, Tianjin University, Tianjin 300350, China

<sup>b</sup> Frontiers Science Center for Synthetic Biology and Key Laboratory of Systems Bioengineering,  
Ministry of Education, Tianjin University, Tianjin 300350, China

<sup>c</sup> Hebei Key Laboratory for Chronic Diseases, School of Basic Medical Sciences, North China  
University of Science and Technology, Tangshan 063210, China

\*Corresponding author: \*Pengcheng Che, Email: [3725930@163.com](mailto:3725930@163.com)

\*Hong Zhang, Email: [zhanghong@tju.edu.cn](mailto:zhanghong@tju.edu.cn)

\*Junjie Li, Email: [li41308@tju.edu.cn](mailto:li41308@tju.edu.cn)

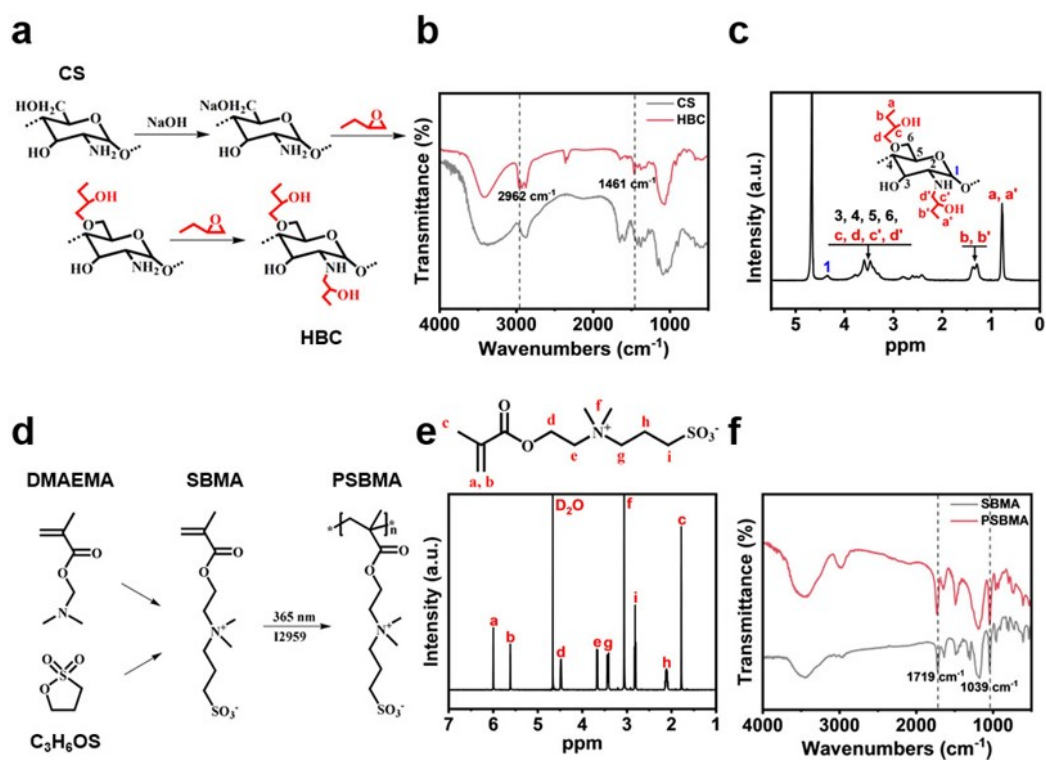

**Fig. S1** (a) Diagram of synthesis of HBC. (b) FT-IR spectra of CS and HBC. (c) <sup>1</sup>H-NMR spectra of CS and HBC. (d) Diagram of synthesis of PSBMA. (e) <sup>1</sup>H-NMR spectra of SBMA. (f) FT-IR spectra of SBMA and PSBMA

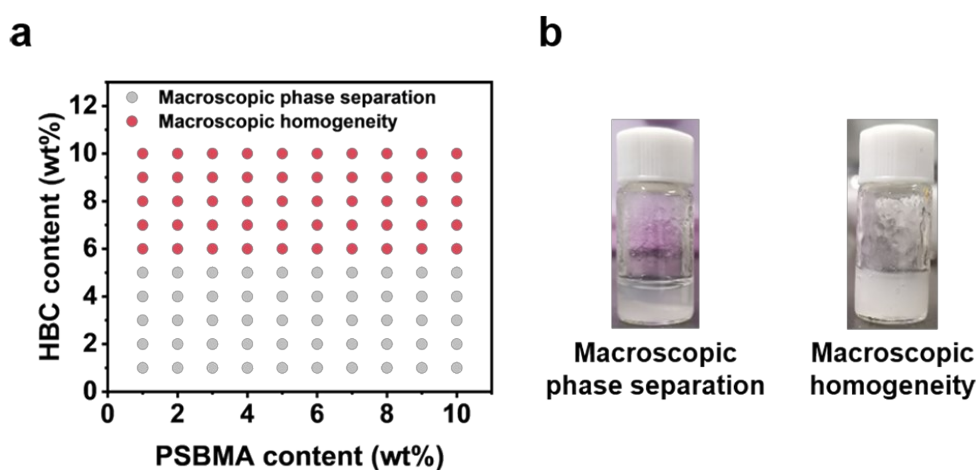

**Fig. S2** (a) Effects of HBC and PSBMA concentrations on the formation of dual networks. (b) Macroscopic phase separation and macroscopic homogeneity of optical photographs.

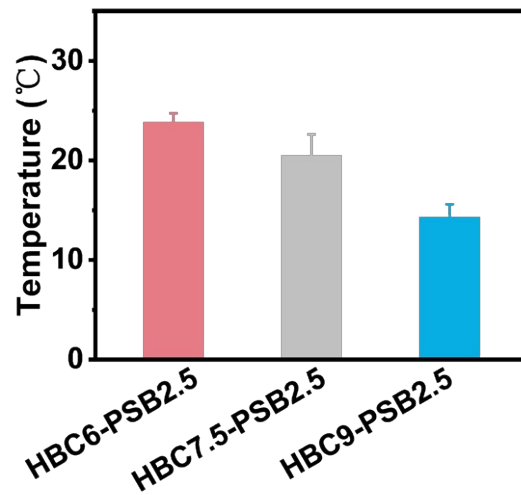

**Fig. S3** Effect of HBC concentration on the formation of HBC<sub>x</sub>-PSB<sub>y</sub> composite hydrogels (where x and y represent the contents of HBC and PSBMA in the hydrogel, respectively).

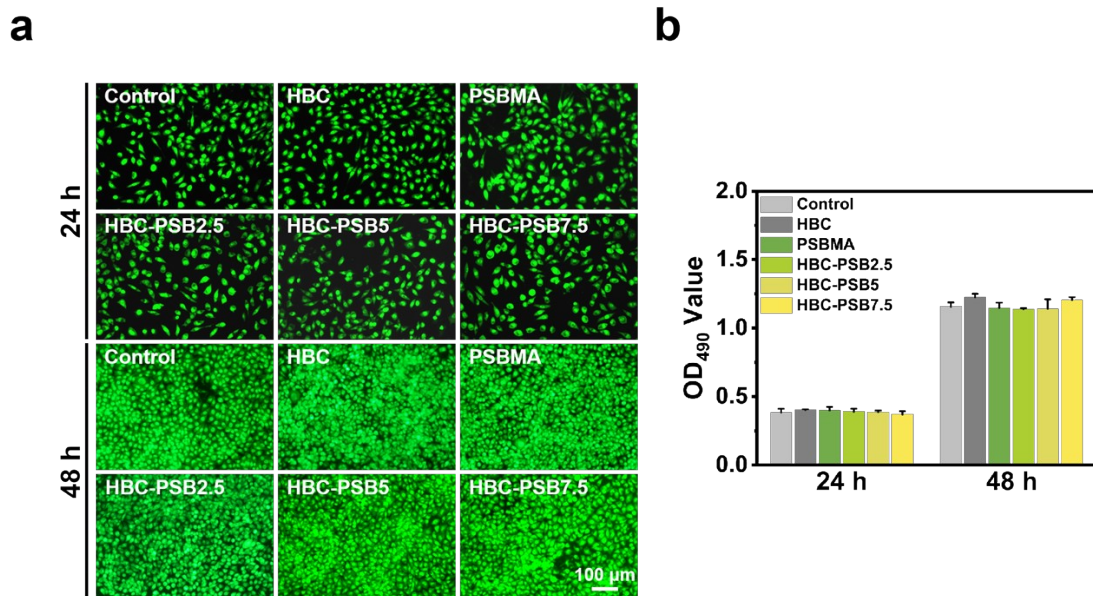

**Fig. S4** (a) Acridine orange/propidium iodide (AO/PI) staining of L929 cells cultured in the medium containing HBC-PSB composite. (b) The OD value of L929 cells cultured in the medium containing HBC-PSB composite.

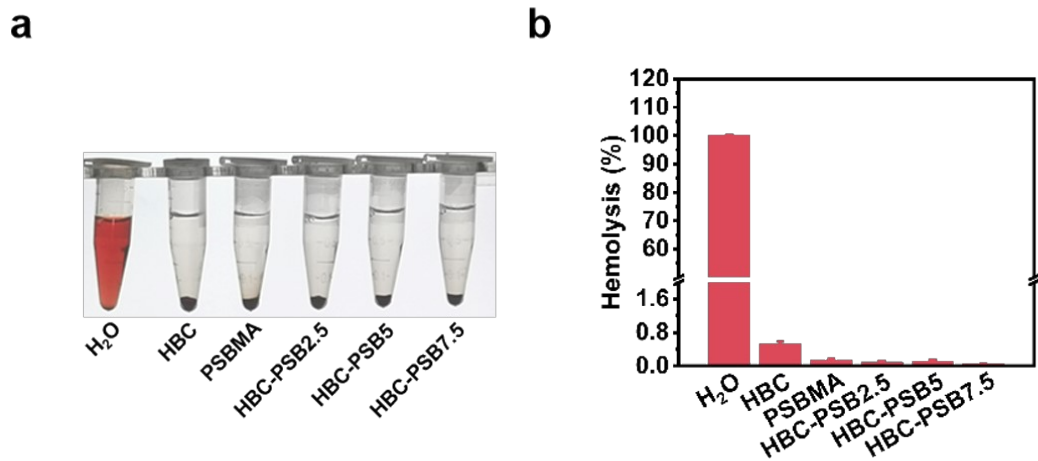

**Fig. S5** Optical photographs (a) and quantitative statistics (b) of hemolysis of hydrogels in different groups.

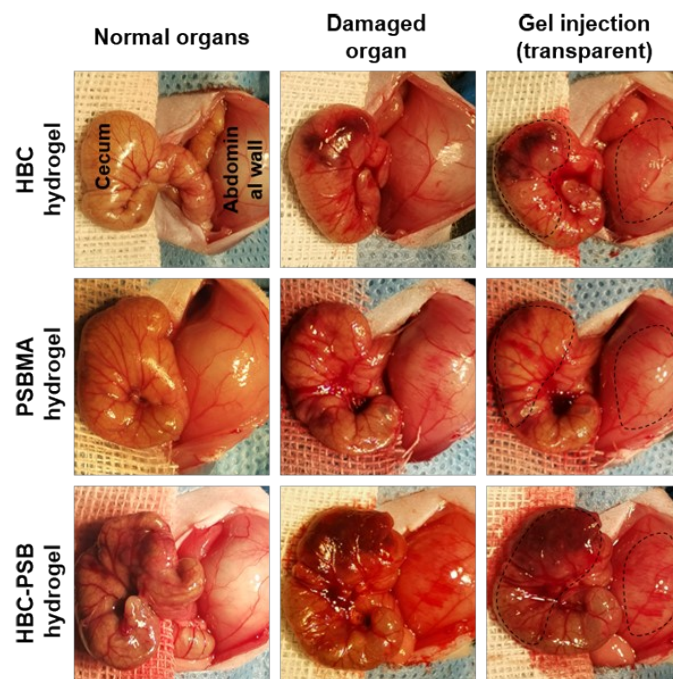

**Fig. S6** Typical photos of cecum and abdominal wall in different hydrogel groups after (a) normal, (b) damaged and (c) gel injection (The dotted line was the gel coverage position).

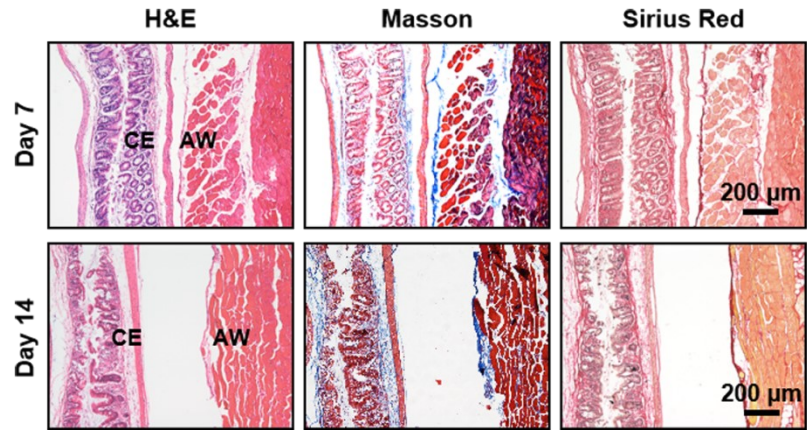

Fig. S7 Representative pictures of histological staining in the normal group.

Table S1 The molecular weight information of HBC and PSBMA.

| Sample | $M_w$ (kDa) | $M_n$ (kDa) | Polydispersity |
|--------|-------------|-------------|----------------|
| HBC    | 1874.93     | 1043.38     | 1.797          |
| PSBMA  | 1281.16     | 1058.55     | 1.210          |
